# Supplementary material
Source: HighWire-hosted journal article supplement (https://jnm.snmjournals.org/highwire/filestream/99320/field_highwire_adjunct_files/0/248484_Supplemental_Data.pdf)

### Supplemental data: Distribution Volume of [<sup>18</sup>F]BMS-986192 in NSCLC Patients.

Decay-corrected tissue- and decay-uncorrected trapped-tracer TACs were performed from <sup>18</sup>F-BMS-986192 input-function fitting and by using an STR model including blood-volume fraction. Model implementation provided estimates of the forward/reverse transport-rate constants and, hence, an estimate of  $V_T = K_i/k_B = 4.7 \text{ mL}\cdot\text{cm}^{-3}$  and of  $K_i/(k_b+\lambda) = 2.1 \text{ mL}\cdot\text{cm}^{-3}$ .

Peak time of the decay-corrected tissue TAC was estimated to be 87 min post-injection. Peak time of the decay-uncorrected trapped-tracer TAC was estimated to be 53 min post-injection. At those peak times, the  $C_{\text{tissue}}/C_{\text{plasma}}$  ratio, that is, a simplified parameter, was found to be 4.5 and 2.2  $\text{mL}\cdot\text{cm}^{-3}$ , respectively.

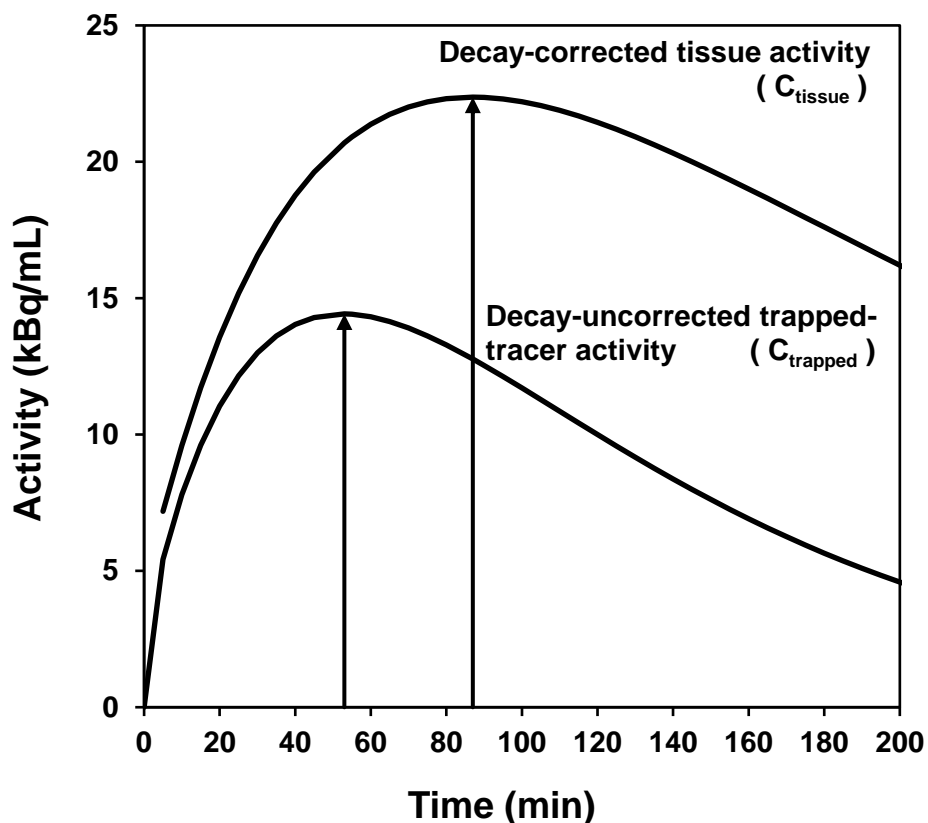

Supplement: 248484_Supplemental_Data.pdf [file 248484_Supplemental_Data.pdf]
